# Supplementary material for: Safety Studies of Pneumococcal Endolysins Cpl-1 and Pal
Source: MDPI journal article supplement (doi:10.3390/v10110638), 2018-11-15
Supplement: s1 [file s1]

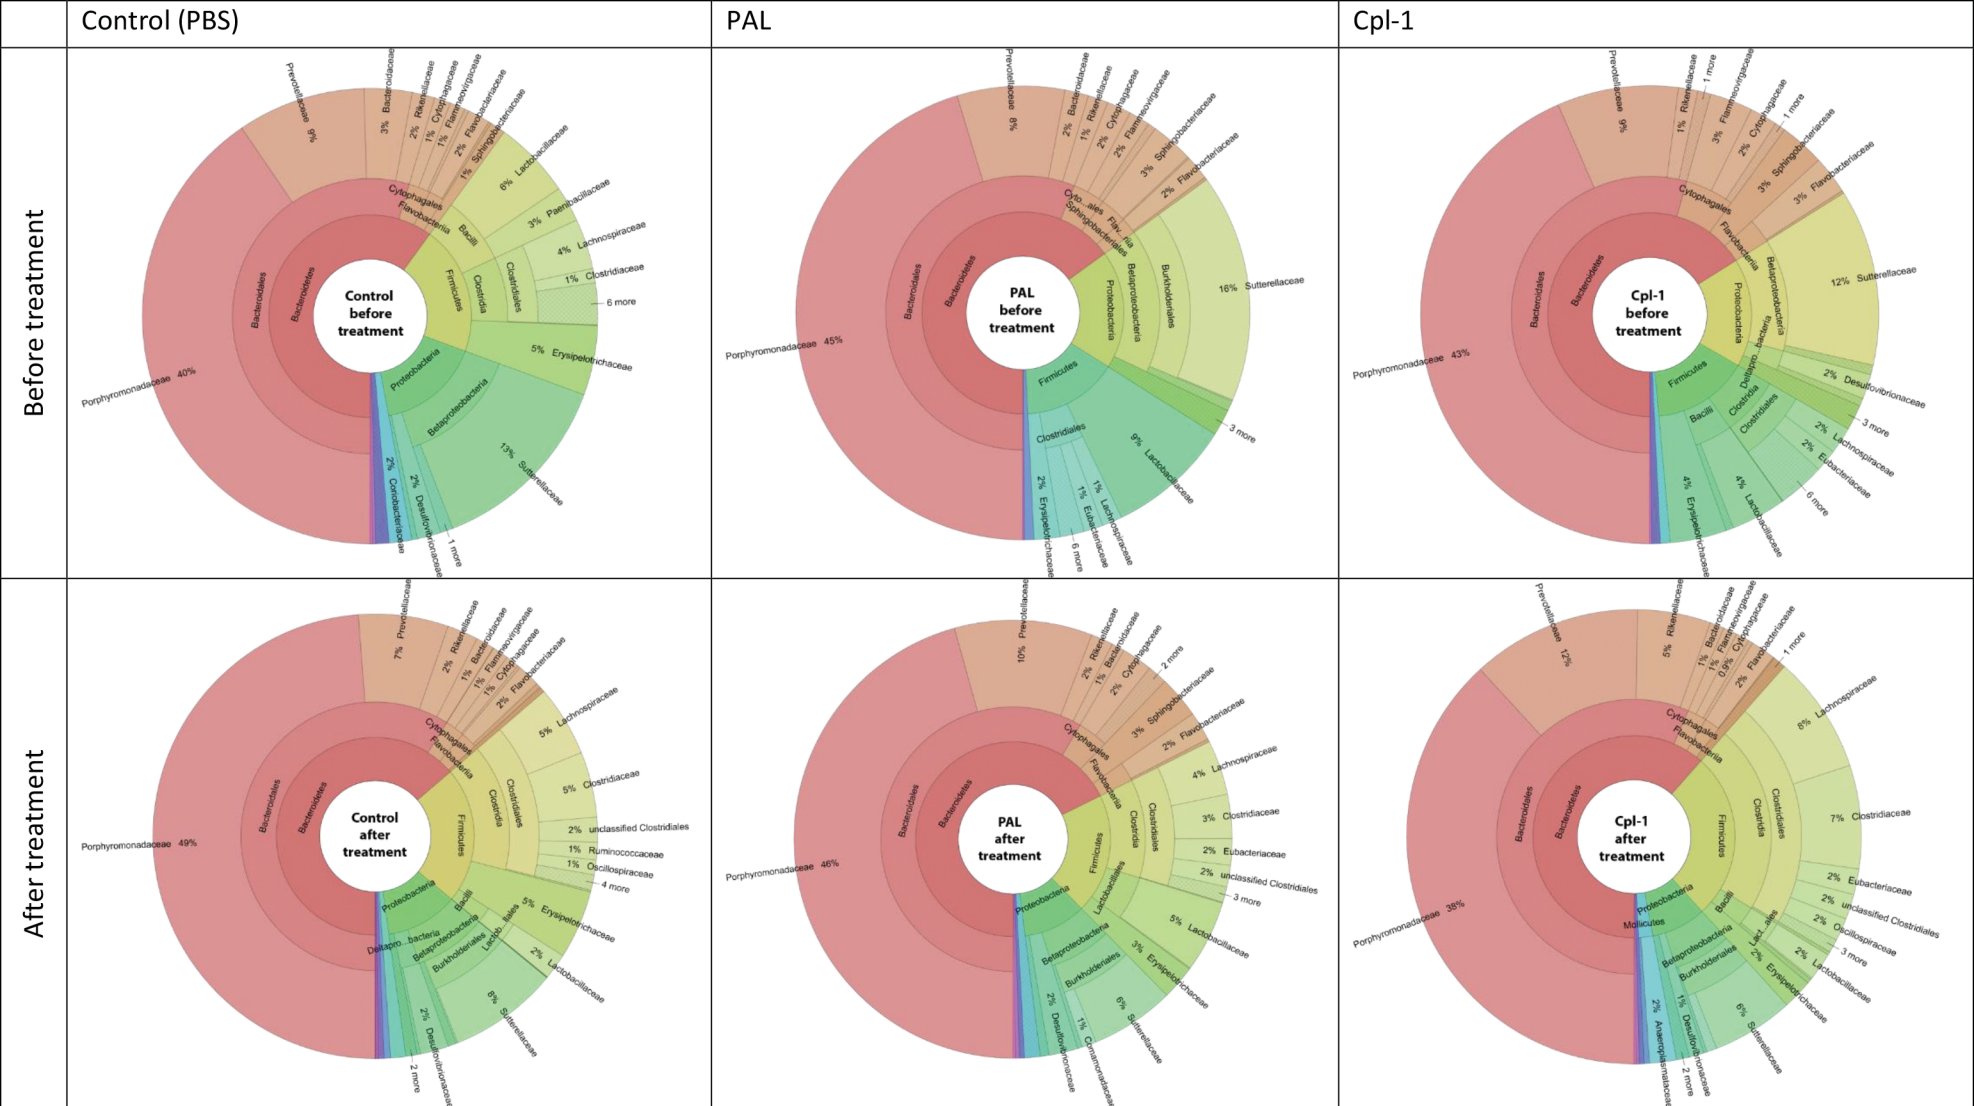

Figure S2. Composition of bacterial microbiome component in mice before and after treatment with Pal and Cpl-1.
