# Supplementary material for: Safety Studies of Pneumococcal Endolysins Cpl-1 and Pal
Source: MDPI journal article supplement (doi:10.3390/v10110638), 2018-11-15
Supplement: s1 [file s1]

Table S3: **Composition of bacterial microbiome component in mice before and after treatment with PAL and Cpl-1.**

|                | Before treatment |            |                |        | After treatment |            |                |        |
|----------------|------------------|------------|----------------|--------|-----------------|------------|----------------|--------|
|                | Bacteroides      | Firmicutes | Proteobacteria | Others | Bacteroides     | Firmicutes | Proteobacteria | Others |
| <b>Cpl-1</b>   | 66 %             | 15 %       | 17 %           | 1.5 %  | 62 %            | 27 %       | 9 %            | 2.5 %  |
| <b>PAL</b>     | 65 %             | 15 %       | 19 %           | 0.8 %  | 68 %            | 20 %       | 10 %           | 2.0 %  |
| <b>control</b> | 60 %             | 21 %       | 16 %           | 3.1 %  | 64 %            | 22 %       | 12 %           | 2.1 %  |
