# Supplementary material for: Safety Studies of Pneumococcal Endolysins Cpl-1 and Pal
Source: MDPI journal article supplement (doi:10.3390/v10110638), 2018-11-15
Supplement: s1 [file s1]

Show Categories: ☐

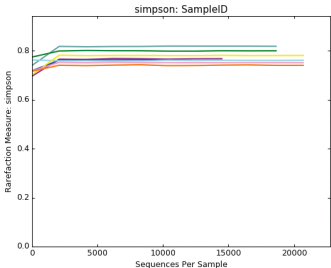

#### Legend

- Control 24h
- Control 0h
- PAL 24h
- Cpl-1 0h
- PAL 0h
- Cpl-1 24h

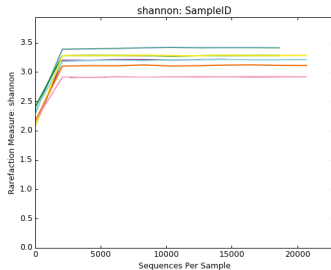

#### Legend

- Control 24h
- Control 0h
- PAL 24h
- Cpl-1 0h
- PAL 0h
- Cpl-1 24h
