# Supplementary material for: Safety Studies of Pneumococcal Endolysins Cpl-1 and Pal
Source: MDPI journal article supplement (doi:10.3390/v10110638), 2018-11-15
Supplement: s1 [file s1]

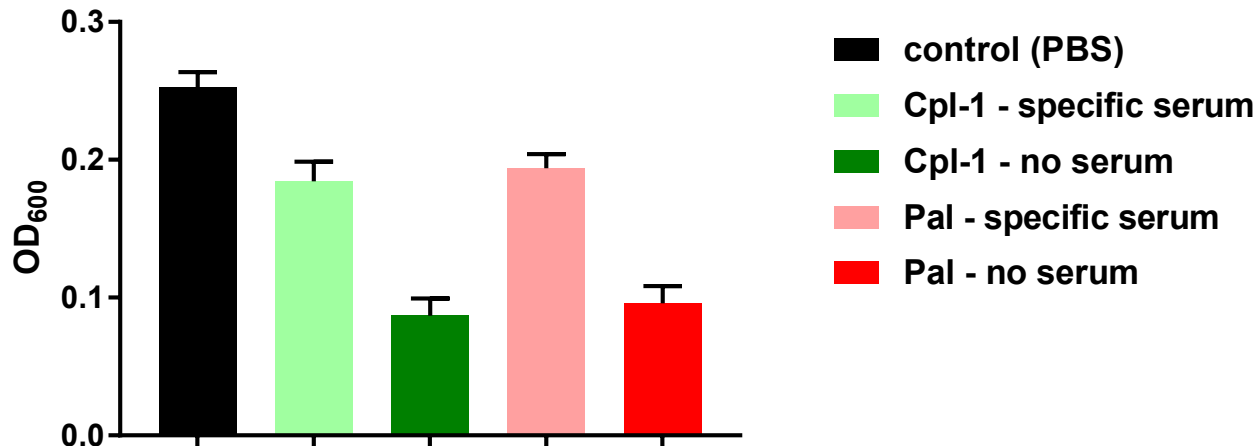

**Figure S4. Bacterial culture density 15 min after treatment with Cpl-1 or Pal lysins (final concentration: 25µg/ml).**
