# Supplementary material for: Safety Studies of Pneumococcal Endolysins Cpl-1 and Pal
Source: MDPI journal article supplement (doi:10.3390/v10110638), 2018-11-15
Supplement: s1 [file s1]

| Test Description             |                                          |
|------------------------------|------------------------------------------|
| Selected Test:               | Moderated T-Test                         |
| Entity List:                 | Filtered on Flags [Detected, Not Dete... |
| Interpretation:              | Cpl-1 vs. Alb                            |
| p-value computation:         | Asymptotic                               |
| Multiple Testing Correction: | Bonferroni-Holm                          |

| Result Summary |       |          |          |          |           |           |
|----------------|-------|----------|----------|----------|-----------|-----------|
|                | P all | P < 0.05 | P < 0.02 | P < 0.01 | P < 0.005 | P < 0.001 |
| FC all         | 58296 | 0        | 0        | 0        | 0         | 0         |
| FC > 1.1       | 35111 | 0        | 0        | 0        | 0         | 0         |
| FC > 1.5       | 5098  | 0        | 0        | 0        | 0         | 0         |
| FC > 2.0       | 1631  | 0        | 0        | 0        | 0         | 0         |
| FC > 3.0       | 404   | 0        | 0        | 0        | 0         | 0         |
| Expecte...     |       | 2914     | 1165     | 582      | 291       | 58        |

| Test Description             |                                            |
|------------------------------|--------------------------------------------|
| Selected Test:               | Moderated T-Test                           |
| Entity List:                 | Filtered on Flags [Detected, Not Detect... |
| Interpretation:              | PAL vs. Alb                                |
| p-value computation:         | Asymptotic                                 |
| Multiple Testing Correction: | Bonferroni-Holm                            |

| Result Summary |       |          |          |          |           |           |
|----------------|-------|----------|----------|----------|-----------|-----------|
|                | P all | P < 0.05 | P < 0.02 | P < 0.01 | P < 0.005 | P < 0.001 |
| FC all         | 58296 | 0        | 0        | 0        | 0         | 0         |
| FC > 1.1       | 41884 | 0        | 0        | 0        | 0         | 0         |
| FC > 1.5       | 21964 | 0        | 0        | 0        | 0         | 0         |
| FC > 2.0       | 5094  | 0        | 0        | 0        | 0         | 0         |
| FC > 3.0       | 1543  | 0        | 0        | 0        | 0         | 0         |
| Expecte...     |       | 2914     | 1165     | 582      | 291       | 58        |

| Test Description             |                                           |
|------------------------------|-------------------------------------------|
| Selected Test:               | Moderated T-Test                          |
| Entity List:                 | Filtered on Flags [Detected, Not Detec... |
| Interpretation:              | Cpl-1 vs. Alb                             |
| p-value computation:         | Asymptotic                                |
| Multiple Testing Correction: | Benjamini-Hochberg                        |

| Result Summary |       |          |          |          |           |           |
|----------------|-------|----------|----------|----------|-----------|-----------|
|                | P all | P < 0.05 | P < 0.02 | P < 0.01 | P < 0.005 | P < 0.001 |
| FC all         | 58296 | 0        | 0        | 0        | 0         | 0         |
| FC > 1.1       | 35111 | 0        | 0        | 0        | 0         | 0         |
| FC > 1.5       | 5098  | 0        | 0        | 0        | 0         | 0         |
| FC > 2.0       | 1631  | 0        | 0        | 0        | 0         | 0         |
| FC > 3.0       | 404   | 0        | 0        | 0        | 0         | 0         |
| Expecte...     |       | 0        | 0        | 0        | 0         | 0         |

| Test Description             |                                            |
|------------------------------|--------------------------------------------|
| Selected Test:               | Moderated T-Test                           |
| Entity List:                 | Filtered on Flags [Detected, Not Detect... |
| Interpretation:              | PAL vs. Alb                                |
| p-value computation:         | Asymptotic                                 |
| Multiple Testing Correction: | Benjamini-Hochberg                         |

| Result Summary |       |          |          |          |           |           |
|----------------|-------|----------|----------|----------|-----------|-----------|
|                | P all | P < 0.05 | P < 0.02 | P < 0.01 | P < 0.005 | P < 0.001 |
| FC all         | 58296 | 0        | 0        | 0        | 0         | 0         |
| FC > 1.1       | 41884 | 0        | 0        | 0        | 0         | 0         |
| FC > 1.5       | 21964 | 0        | 0        | 0        | 0         | 0         |
| FC > 2.0       | 5094  | 0        | 0        | 0        | 0         | 0         |
| FC > 3.0       | 1543  | 0        | 0        | 0        | 0         | 0         |
| Expecte...     |       | 0        | 0        | 0        | 0         | 0         |
