# Supplementary figures and images for: Safety Studies of Pneumococcal Endolysins Cpl-1 and Pal
Source: MDPI journal article supplement (doi:10.3390/v10110638), 2018-11-15

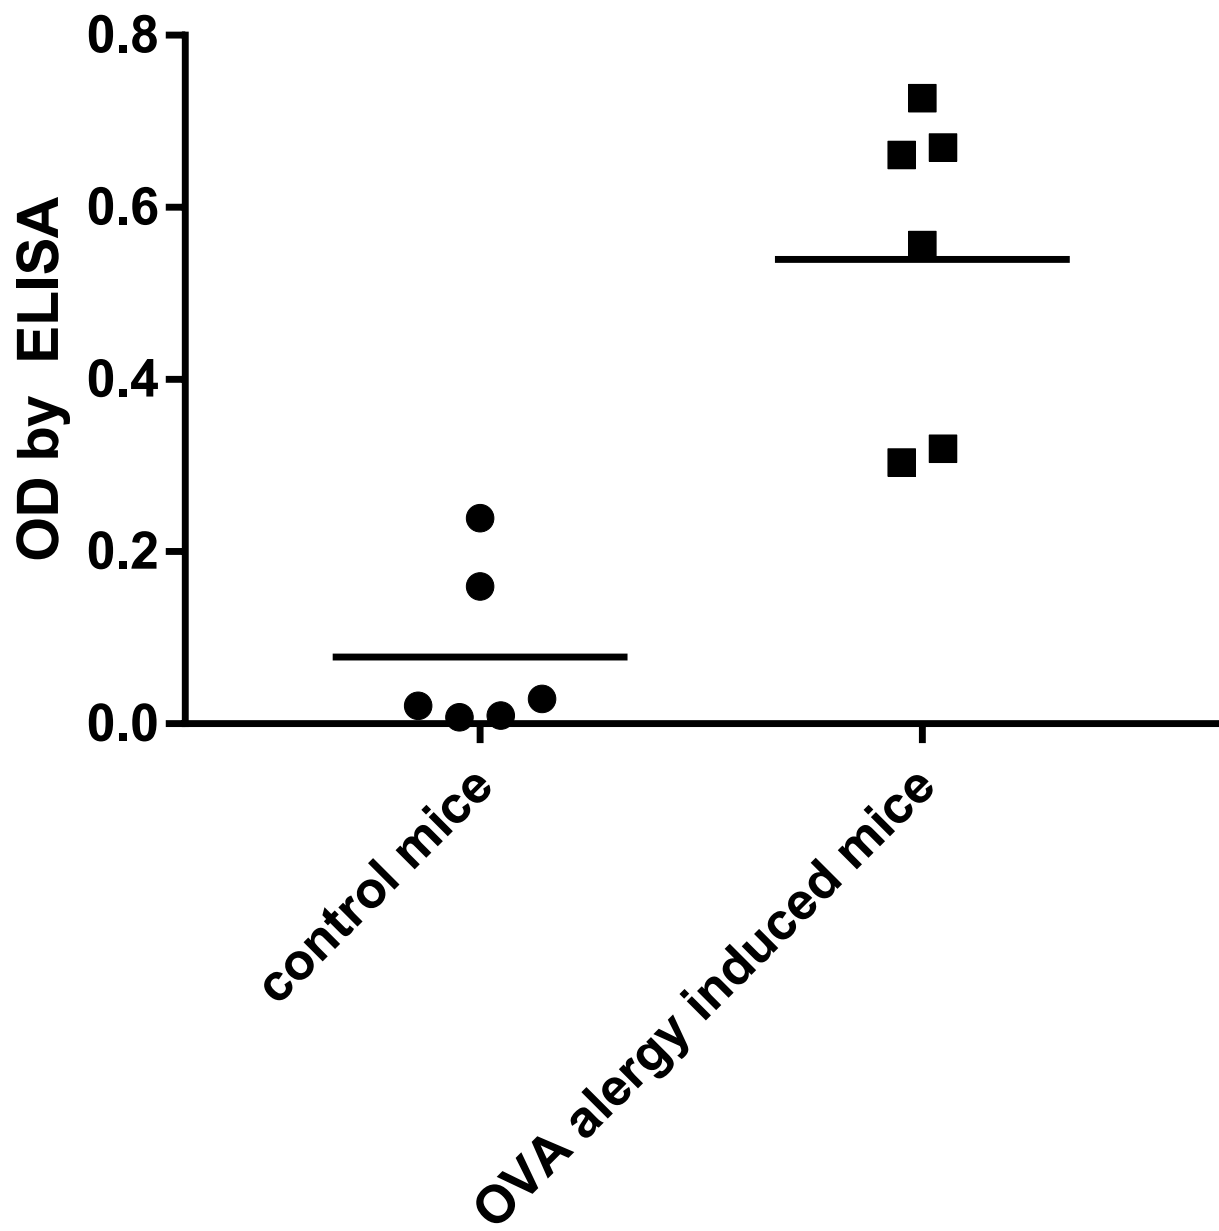

Supplement: s1 [file s1]
